# Supplementary material for: Is My Network Module Preserved and Reproducible?
Source: PLOS journal article supplement (doi:10.1371/journal.pcbi.1001057), 2011-01-20
Supplement: S6 (10.1371/journal.pcbi.1001057.s006) [file journal.pcbi.1001057.s006]

301 Moved Permanently

# Moved Permanently

The document has moved here.

---

Apache Server at www.ploscompbiol.org Port 80
